# Supplementary material
Source: Research Square preprint supplement (doi:10.21203/rs.3.rs-9426934/v1)
Supplement: Supplementary file 1 [file 4fef5b5c23a0678b09d4327e.docx]

**Samarium-Promoted Ni/YSZ Catalysts for Enhanced CO2 Dry Reforming: Insights into Reducibility and Surface Basicity**

**Supplementary Information**

Table S1. Deconvolution results of Zr 3d XPS spectra for the 5Ni/8YZr and 5Ni+xSm/8YZr (x=0.5, 1, 2 wt.%) catalysts, showing binding energies (eV) and corresponding peak area percentages (%) for each chemical state.

| **Catalysts** | | **5Ni/8YZr** | **5Ni+0.5Sm/8YZr** | **5Ni+1Sm/8YZr** | **5Ni+2Sm/8YZr** |
| --- | --- | --- | --- | --- | --- |
| Zr 3d Peak 1 | B.E. (eV) | 182.2 | 181.3 | 181.3 | 181.3 |
| **% Area** | **79.8** | **79.9** | **80.6** | **74.9** |
| Zr 3d Peak 2 | B.E. (eV) | 184.7 | 183.8 | 183.8 | 183.7 |
| **% Area** | **20.2** | **20.1** | **19.4** | **25.1** |

Table S2. Deconvolution results of Y3d XPS spectra for the catalysts 5Ni/8YZr and 5Ni+xSm/8YZr (x=0.5, 1, 2 wt.%), showing binding energies (eV) and corresponding peak area percentages (%) for each chemical state.

| **Catalysts** | | **5Ni/8YZr** | **5Ni+0.5Sm/8YZr** | **5Ni+1Sm/8YZr** | **5Ni+2Sm/8YZr** |
| --- | --- | --- | --- | --- | --- |
| Y 3d Peak 1 | B.E. (eV) | 157.5 | 156.6 | 156.5 | 156.5 |
| **% Area** | **86.9** | **85.7** | **87.9** | **79.1** |
| Y 3d Peak 2 | B.E. (eV) | 159.7 | 158.8 | 158.7 | 158.6 |
| **% Area** | **13.1** | **14.3** | **12.1** | **20.9** |

Table S3. Deconvolution results of Sm 3d XPS spectra for the catalysts 5Ni/8YZr and 5Ni+xSm/8YZr (x=0.5, 1, 2 wt.%), showing binding energies (eV) and corresponding peak area percentages (%) for each chemical state.

| **Catalysts** | | **5Ni/8YZr** | **5Ni+0.5Sm/8YZr** | **5Ni+1Sm/8YZr** | **5Ni+2Sm/8YZr** |
| --- | --- | --- | --- | --- | --- |
| Sm 3d5/2 Peak 1 | B.E. (eV) | 1081.5 | 1081.3 | 1081.4 | 1081.3 |
| **% Area** | **65.0** | **62.1** | **62.8** | **59.1** |
| Sm 3d5/2 Peak 2 | B.E. (eV) | 1108.5 | 1108.5 | 1108.5 | 1108.4 |
| **% Area** | **35.0** | **37.9** | **37.2** | **40.9** |

Table S4. Deconvolution results of Ni 2p XPS spectra for the 5Ni/8YZr and 5Ni+xSm/8YZr (x=0.5, 1, 2 wt.%) catalysts, showing binding energies (eV) and corresponding peak area percentages (%) for each chemical state.

| Catalysts | | 5Ni/8YZr | 5Ni+0.5Sm/8YZr | 5Ni+1Sm/8YZr | 5Ni+2Sm/8YZr |
| --- | --- | --- | --- | --- | --- |
| Ni 2p Peak 1 | B.E. (eV) | 854.1 | 854.2 | 854.0 | 853.6 |
| **% Area** | **46.0** | **34.2** | **33.2** | **32.8** |
| Ni 2p Peak 2 | B.E. (eV) | 860.2 | 860.5 | 860.1 | 860.0 |
| **% Area** | **32.6** | **27.6** | **32.3** | **30.8** |
| Ni 2p Peak 3 | B.E. (eV) | 872.1 | 871.8 | 871.8 | 871.4 |
| **% Area** | **13.9** | **18.6** | **16.9** | **17.1** |
| Ni 2p Peak 4 | B.E. (eV) | 877.9 | 878.6 | 878.3 | 878.3 |
| **% Area** | **7.5** | **19.6** | **17.6** | **19.3** |

Table S5. Deconvolution results of O 1s XPS spectra for the 5Ni/8YZr and 5Ni+xSm/8YZr (x=0.5, 1, 2 wt.%) catalysts, showing binding energies (eV) and corresponding peak area percentages (%) for each chemical state.

| **Catalysts** | | **5Ni/8YZr** | **5Ni+0.5Sm/8YZr** | **5Ni+1Sm/8YZr** | **5Ni+2Sm/8YZr** |
| --- | --- | --- | --- | --- | --- |
| O 1s Peak 1 | B.E. (eV) | 528.2 | 527.7 | 527.4 | 527.7 |
| **% Area** | **20.1** | **16.3** | **22.2** | **24.3** |
| O 1s Peak 2 | B.E. (eV) | 529.5 | 529.0 | 529.0 | 529.0 |
| **% Area** | **73.6** | **77.1** | **70.8** | **56.5** |
| O 1s Peak 3 | B.E. (eV) | 531.9 | 531.3 | 531.1 | 530.8 |
| **% Area** | **6.2** | **6.6** | **7.0** | **19.2** |
